# Supplementary material for: Hydroxylation of benzene to phenol over heteropoly acid H5PMo10V2O40 supported on amine-functionalized MCM-41
Source: Royal Society of Chemistry journal article supplement (doi:10.1039/d1ra04269f), 2021-01-01
Supplement: d1ra04269f1.pdf [file d1ra04269f1.pdf]

## Supporting Information

### Hydroxylation of benzene to phenol over heteropoly acid $\text{H}_5\text{PMo}_{10}\text{V}_2\text{O}_{40}$ supported onto amine-functionalized MCM-41

YanJun Li, Shichao Li\*, Yan Kong

(a. School of Material and Chemical Engineering, Yibin University, Yibin 644007, China;

b. Department of Safety and Operation Management, Yibin Tianyuan Group Company Limited, Yibin  
644007, China)

\*Corresponding author

E-mail address: mysimpledesign@163.com (Shichao Li)

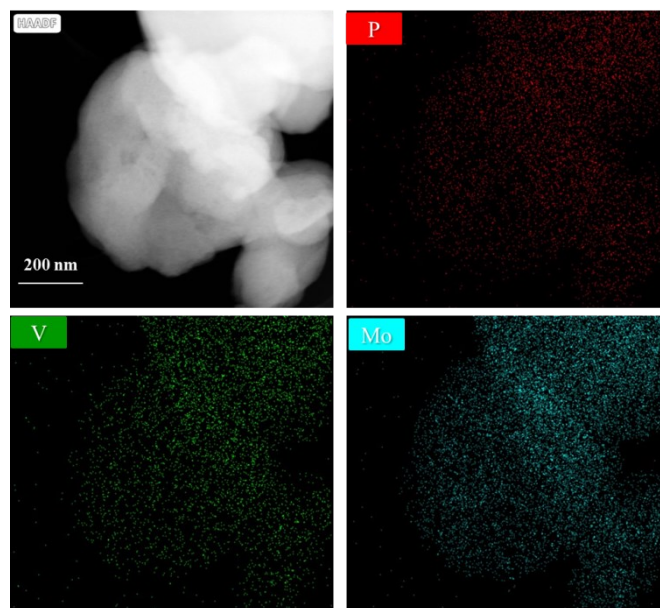

Fig. S1. The results of element mapping for HPMoV/MCM-41.

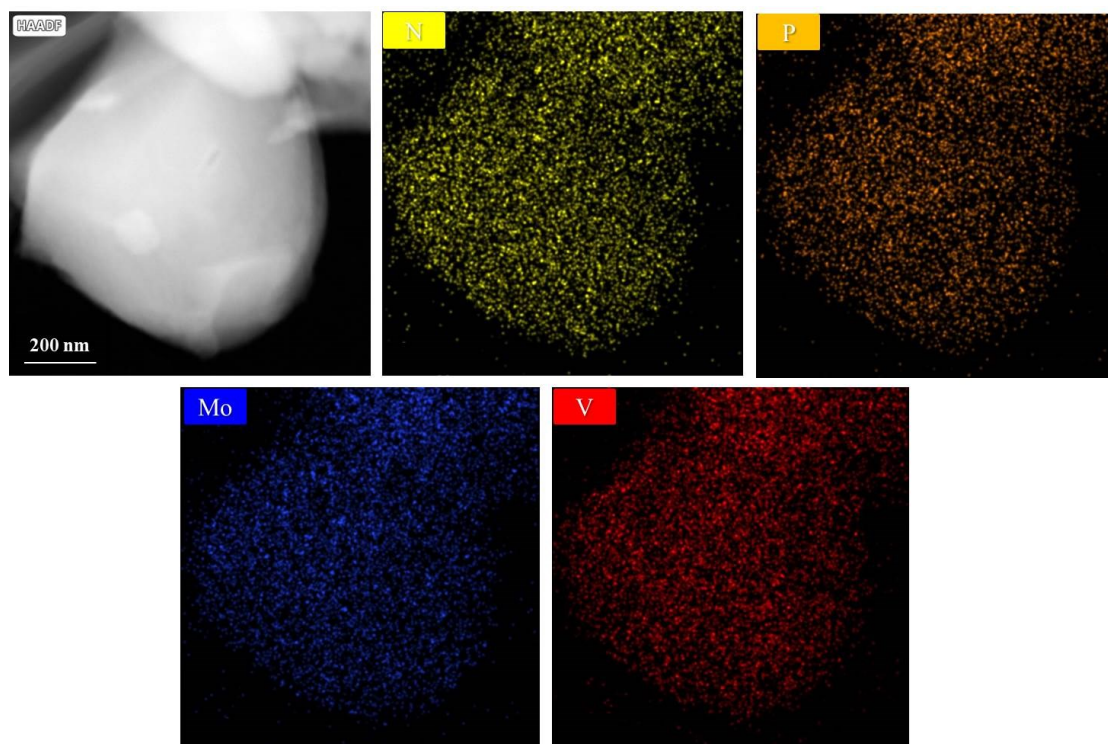

Fig. S2. The results of element mapping for HPMoV[ethanol]/MCM-41-NH<sub>2</sub>.

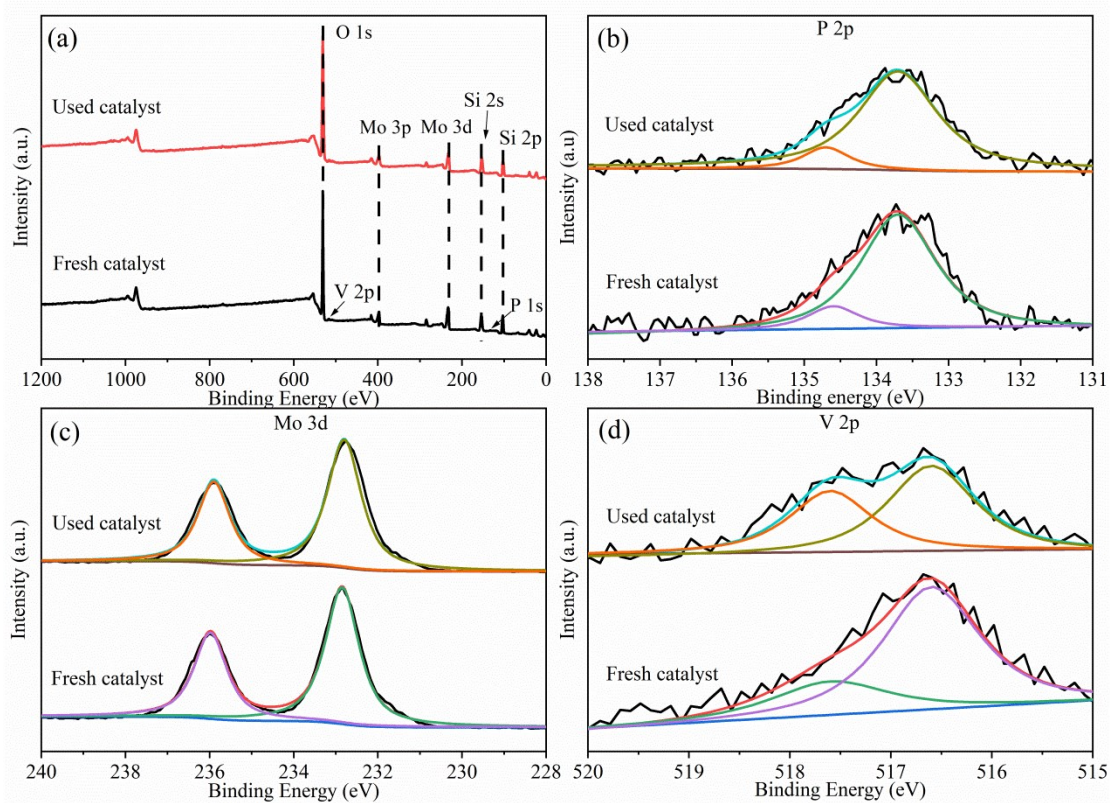

Fig. S3. XPS spectra of (a) survey spectra, (b) P 2p, (c) Mo 3d, (d) V 2p, for the fresh and used

HPMoV/MCM-41

## Carbon Balance

Table S1 Calculation of carbon balance (CB) for the oxidation of benzene over prepared catalysts.

| Entry | Catalysts                             | C before oxidation (mmol) |           | C after oxidation (mmol) |          |          |       | CB(%) |
|-------|---------------------------------------|---------------------------|-----------|--------------------------|----------|----------|-------|-------|
|       |                                       | BZ                        | BZ        | PH                       | HQ       | BQ       | Total |       |
| 1     | MCM-41                                | 203.1                     | 201.9     | 0.5±0.03                 | -        | -        | 202.4 | 99.6  |
| 2     | MCM-41-NH <sub>2</sub>                | 203.1                     | 201.9     | 0.6±0.03                 | -        | -        | 202.5 | 99.7  |
| 3     | HPMoV                                 | 203.1                     | 156.7±0.3 | 44.4±0.3                 | 0.8±0.04 | 0.5±0.04 | 202.4 | 99.6  |
| 4     | HPMoV                                 | 203.1                     | 159.6±0.3 | 40.9±0.3                 | 0.7±0.03 | 0.5±0.03 | 201.7 | 99.3  |
| 5     | HPMoV/MCM-41                          | 203.1                     | 167.6±0.4 | 33.7±0.3                 | 0.7±0.03 | 0.5±0.03 | 202.5 | 99.7  |
| 6     | HPMoV[ethanol]/MCM-41-NH <sub>2</sub> | 203.1                     | 159.4±0.3 | 41.5±0.4                 | 0.8±0.02 | 0.4±0.04 | 202.1 | 99.5  |
| 7     | HPMoV[water]/MCM-41-NH <sub>2</sub>   | 203.1                     | 162.1±0.3 | 38.3±0.4                 | 1.1±0.03 | 0.4±0.05 | 201.9 | 99.4  |

Reaction conditions: benzene (3.0 mL, 33.4 mmol), H<sub>2</sub>O<sub>2</sub>/benzene=3:1, catalyst (200 mg), mixed solvent of acetonitrile and acetic acid (30 mL, volume ratio 1:1), 70 °C, 9 h

BZ: benzene; PH: phenol; HQ: hydroquinone; BQ: benzoquinone; CB: carbon balance;

Carbon balance (CB) = [ $\frac{\text{(total no. of carbon (in mmol) present in the reaction mixture after catalysis)}}{\text{(total no. of carbon (in mmol) present in the reaction mixture before catalysis)}} \times 100$ ] %.
